# Supplementary material for: Apoptosis Induction Pathway in Human Colorectal Cancer Cell Line SW480 Exposed to Cereal Phenolic Extracts
Source: MDPI journal article supplement (doi:10.3390/molecules24132465), 2019-07-04
Supplement: s1 [file s1]

Article

# Apoptosis Induction Pathway in Human Colorectal Cancer Cell Line SW480 Exposed to Cereal Phenolic Extracts

Shiwangni Rao <sup>1</sup>, Kenneth Chinkwo <sup>1,\*</sup>, Abishek Santhakumar <sup>1</sup>, Stuart Johnson <sup>2</sup> and Christopher Blanchard <sup>1</sup>

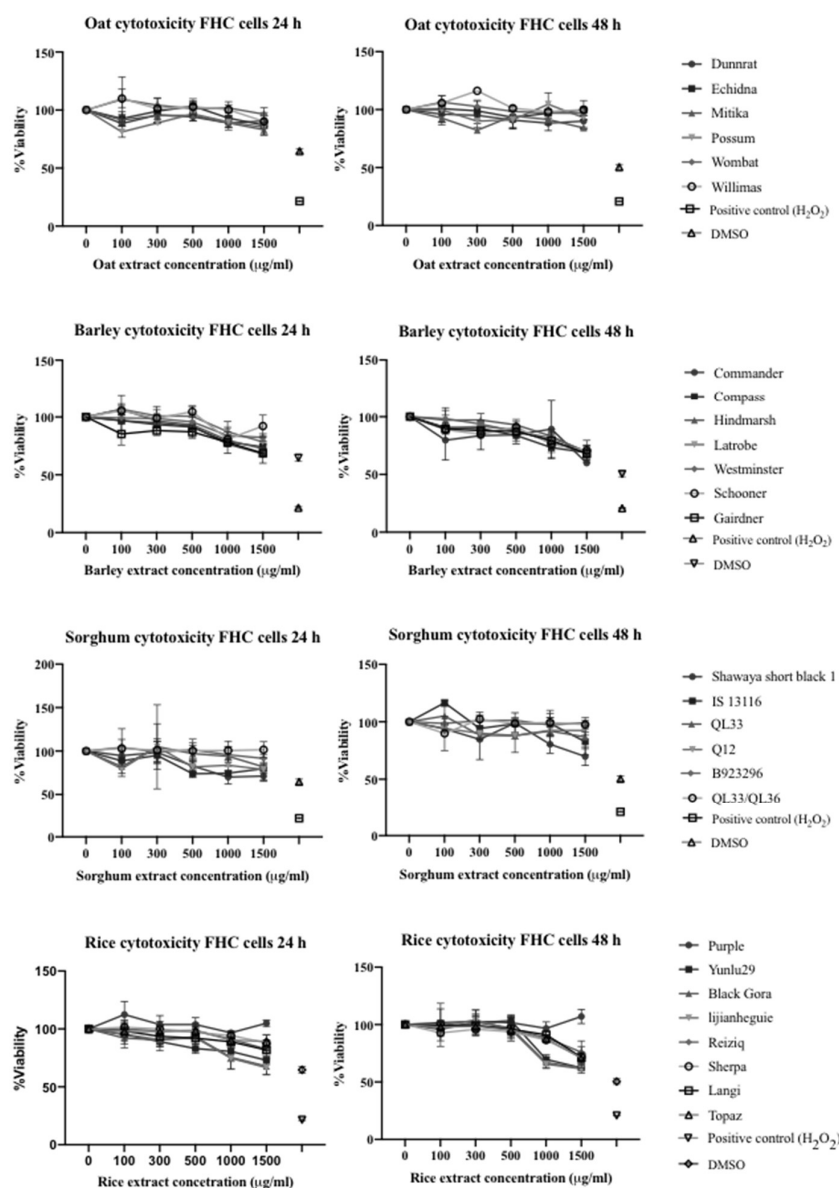

**Figure 1.** Cytotoxic effects of phenolic extracts on normal colorectal cells FHC at 24 h and 48 h, results represent mean  $\pm$  standard deviation ( $n = 3$ ).
